# Supplementary material for: Phenotypic Mapping of Pathologic Cross-Talk between Glioblastoma and Innate Immune Cells by Synthetic Genetic Tracing
Source: Oxford University Press journal article supplement (doi:10.1158/2159-8290.cd-20-0219), 2020-12-23
Supplement: 21598290cd200219-sup-238133_2_supp_6749111_qkcv64.xlsx [file 21598290cd200219-sup-238133_2_supp_6749111_qkcv64.xlsx]

## Sheet: GBM-sLCR features
ID	Phenotype	FACS IDH1mut hGICs signal	FACS IDH1wt hGICs signal	TFBS ratio	Num. Signature-Genes	Num. TF Genes	Num. TFBS motifs	Num. CRE*	Sequence Length	Signature genes	TF genes	TFBS motifs	Sequence
MGT#1	GBM-MES ( Verhaak et al. 2010 )	weak	weak	47.5	27	62	160	5.51333	827	KYNU; BNC2; DOCK2; F13A1; NRP1; LHFPL2; PTPRC; AIM1; CCL2; ALOX5; PRDM1; IL7R; AMPD3; MAPK13; TES; CYBB; RAB11FIP1; IL15RA; LCP1; ST14; NCF2; PLAU; SERPINE1; TLR1; C3AR1; IRAK1; PTPN7;	AHR; ARID3A; ARID5A; ARNT; BACH1; BATF; CEBPB; CEBPD; CREB3L2; ELF1; ELF4; ELK3; ESR1; ETV7; FLI1; FOSL1; FOSL2; GATA6; HLX; HOXB6; IKZF1; IRF1; IRF5; IRF8; JDP2; JUNB; KLF5; KLF6; MAF; MAFB; MAFF; MBD2; MEF2A; NFKB1; NFKB2; PLAG1; POU2AF1; POU2F2; PRDM1; PRRX1; REL; RELB; RREB1; RUNX1; RUNX2; RUNX3; SP1; SP100; SPI1; SRF; STAT2; STAT5A; STAT6; TBX19; TEAD3; TFE3; TFEC; VDR; VENTX; ZBTB7A; ZBTB7B…	MA0002.1_RUNX1; MA0004.1_Arnt; MA0050.1_IRF1; MA0052.1_MEF2A; MA0061.1_NF-kappaB; MA0073.1_RREB1; MA0079.1_SP1; MA0080.1_SPI1; MA0083.1_SRF; MA0101.1_REL; MA0105.1_NFKB1; MA0112.1_ESR1; MA0117.1_Mafb; MA0002.2_RUNX1; MA0112.2_ESR1; MA0151.1_ARID3A; MA0163.1_PLAG1; MA0080.2_SPI1; MA0079.2_SP1; BU0001_Arid3a_primary; BU0002_Arid5a_primary; BU0023_Gata6_primary; BU0035_Irf5_primary; BU0038_Jundm2_pr…	ATATTTATTTTTAGGACCAGAAAGTTAAAGTGAATTGGATTTGATCCATTTTCTGAAAGGCTGGCAAGAATTCTTGACATTGCACAGGAATTTCCATGTCAGCATGTTCTCACATGTATGATCTAATTTAGAGATTATTTTGGGGGGCGGGGGTTGAGGAAATGGCATGACTCAGAGTTTAAAAGCCCCAAATCTTAGCTGTGCCTGTGTAGCTTTACCACATAACCCATTGATAACTTAGTTGTGCAACCATCACCACCATCTGTTTTCAGAACTCTTTTCATTTTGCGAAACTGAAACCCGTTAAGCACTGATTTCCCACTCTCCCTCCTCCCAGCCCATAGCAAACCACCATCCCACCAGCACTTTCATTTCGCAAATGGCAAAACTGAAGCCGAT…
MGT#2	GBM-MES ( Verhaak et al. 2010 )	weak	weak	51.25	27	62	160	6.91333	1037	KYNU; BNC2; DOCK2; F13A1; NRP1; LHFPL2; PTPRC; AIM1; CCL2; ALOX5; PRDM1; IL7R; AMPD3; MAPK13; TES; CYBB; RAB11FIP1; IL15RA; LCP1; ST14; NCF2; PLAU; SERPINE1; TLR1; C3AR1; IRAK1; PTPN7;	AHR; ARID3A; ARID5A; ARNT; BACH1; BATF; CEBPB; CEBPD; CREB3L2; ELF1; ELF4; ELK3; ESR1; ETV7; FLI1; FOSL1; FOSL2; GATA6; HLX; HOXB6; IKZF1; IRF1; IRF5; IRF8; JDP2; JUNB; KLF5; KLF6; MAF; MAFB; MAFF; MBD2; MEF2A; NFKB1; NFKB2; PLAG1; POU2AF1; POU2F2; PRDM1; PRRX1; REL; RELB; RREB1; RUNX1; RUNX2; RUNX3; SP1; SP100; SPI1; SRF; STAT2; STAT5A; STAT6; TBX19; TEAD3; TFE3; TFEC; VDR; VENTX; ZBTB7A; ZBTB7B…	MA0002.1_RUNX1; MA0004.1_Arnt; MA0050.1_IRF1; MA0052.1_MEF2A; MA0061.1_NF-kappaB; MA0073.1_RREB1; MA0079.1_SP1; MA0080.1_SPI1; MA0083.1_SRF; MA0101.1_REL; MA0105.1_NFKB1; MA0112.1_ESR1; MA0117.1_Mafb; MA0002.2_RUNX1; MA0112.2_ESR1; MA0151.1_ARID3A; MA0163.1_PLAG1; MA0080.2_SPI1; MA0079.2_SP1; BU0001_Arid3a_primary; BU0002_Arid5a_primary; BU0023_Gata6_primary; BU0035_Irf5_primary; BU0038_Jundm2_pr…	TAATGCATCTAGAACAGCAGGGCCACCTCCTTCTCTCCCCCGCGGGCATGGGCCCCCACCCCCACTGCCGGCAGAGTGCTGAGGACTCGTGCACCATGAGAACTTCTGACCATGAGAACTTTGACTTCCGGATTTGGGGGATCTGCCCAGGTGAACACAATGCAAGGGGCTGCATGACCTACCAGGACAGAACTTTCCCCAATTACAGGGTGACTCACAGCCGCATTGGTGACTCACTTCAATGTGTCATTTCCGGCTGCTGTGTGTGAGCAGTGGACACGTGAGGGGGGGGTGGGTGAGAGAGACAGGCCACATTGTGCAACAGATCTCTAGAGCTTTTTCATCTTGCAAAACTGAAACTGTATACCCATGGAACAACAGCTCCCTGCTCCCCTCCCC…
CLGT#1	GBM-CL ( Verhaak et al. 2010 )	strong	strong	47.3684	32	34	114	7.4	1110	ABI2; ACSL3; B3GALT1; CC2D1A,CCDC130; DAG1; DENND2A; FZR1; GNAS; HMG20B; IRS2; JUND; KIAA0355; MLC1; NES; PLCG1; POLRMT; POMT2; POU3F2; PTN; PTPRA; QTRT1; SALL1; SAMD4A; SCRN1; SEMA6D; SIN3B; SLC20A2; TLE1; TMEM161A; UPF1; VPS16; ZNF264;	ARNT2; ARNTL; CREB5; ERF; ESRRG; ETV4; FOXC1; FOXG1; FOXO1; GLI2; GMEB2; HES1; HNF4G; IRF3; JUND; MEIS1; NFIC; NOTCH1; NR2E1; NR2F6; PAX6; POU3F2; PPARGC1A; RFX2; RREB1; SMAD1; SOX2; SOX21; SOX9; TBX2; TCF3; TEAD1; TEAD3; TGIF2;	MA0003.1.TFAP2A; MA0070.1.PBX1; MA0087.1.Sox5; MA0100.1.Myb; MA0103.1.ZEB1; MA0109.1.Hltf; MA0139.1.CTCF; MA0143.1.Sox2; MA0155.1.INSM1; MA0442.1.SOX10; BU0008.E2F2_primary; BU0009.E2F3_primary; BU0045.Myb_primary; BU0046.Mybl1_primary; BU0061.Sox11_primary; BU0062.Sox12_primary; BU0071.Sox4_primary; BU0072.Sox5_primary; BU0076.Sp4_primary; BU0085.Tcfap2a_primary; BU0097.Zfp281_primary; ETS0014.h…	ATGGTCTCAATCTCCTGACCTTGTGATCCGCCCACCTCGGCCTCCCAAAGTGCTGGGATTACAGGTGTGAGCCACCACGCCCAGCCGACAGTCCCTTATCTGGTTCATCTTCGTACCTCTAAAAGTCAGCATGGATGCTCTATTAATGATATATTTATACATATTAGCAACAAACAATTGGAAACTAAAACTTTAAAAAGACATTCTCACACCTGTAATCCCAGCATGTTGGGAGGTCGAGGCAGGCGAATCACGAGGTCAGGAGTTCGAGACCAGCCTGGCCAACATGGTGAAACTCTGGAAGACCGAAACTATTCAGCAAGAACTAAGAACCACAATGTTAAGGGGGTCCATTGTTTATTTTTTTTTCTTTAGAGGATGAAAACCAAAGGTCAGGTG…
CLGT#2	GBM-CL ( Verhaak et al. 2010 )	strong	strong	54.386	32	34	114	7.41333	1112	ABI2; ACSL3; B3GALT1; CC2D1A,CCDC130; DAG1; DENND2A; FZR1; GNAS; HMG20B; IRS2; JUND; KIAA0355; MLC1; NES; PLCG1; POLRMT; POMT2; POU3F2; PTN; PTPRA; QTRT1; SALL1; SAMD4A; SCRN1; SEMA6D; SIN3B; SLC20A2; TLE1; TMEM161A; UPF1; VPS16; ZNF264;	ARNT2; ARNTL; CREB5; ERF; ESRRG; ETV4; FOXC1; FOXG1; FOXO1; GLI2; GMEB2; HES1; HNF4G; IRF3; JUND; MEIS1; NFIC; NOTCH1; NR2E1; NR2F6; PAX6; POU3F2; PPARGC1A; RFX2; RREB1; SMAD1; SOX2; SOX21; SOX9; TBX2; TCF3; TEAD1; TEAD3; TGIF2;	MA0003.1.TFAP2A; MA0070.1.PBX1; MA0087.1.Sox5; MA0100.1.Myb; MA0103.1.ZEB1; MA0109.1.Hltf; MA0139.1.CTCF; MA0143.1.Sox2; MA0155.1.INSM1; MA0442.1.SOX10; BU0008.E2F2_primary; BU0009.E2F3_primary; BU0045.Myb_primary; BU0046.Mybl1_primary; BU0061.Sox11_primary; BU0062.Sox12_primary; BU0071.Sox4_primary; BU0072.Sox5_primary; BU0076.Sp4_primary; BU0085.Tcfap2a_primary; BU0097.Zfp281_primary; ETS0014.h…	TTAATTAAGAATATCTGGCTGGCCACGTGTTTGTAAAGAAAAACCAAGACGGCCAGGCGAGGTGGCTCACACCTGTAATCCCAGCACTTTGGGAGGCCGAGGCGGGCGCTGCCCTTCGGCCTTCAAGGAGGAATTCCTACTGTTTATGAAGATCGGGTTTGGGTTTTTGGTTTTTTTTTTCTTTTTCTTTTTTCCGTGGTGGTGGTGGGTGGGCTTTTGTTCTTTTTGTTTTTTCTGTGGTGGTGGTGGGTGGGCTTTATGAATATACCATATTTTGCCTATTGTTTTTCTATTTATCAGGTGGTGTCATTTGAGTTGTTTTCACCCTCTTGTGACTATGAATAATGATACTATAAACAATCTTATACAGCATCAGTGTCAAAAATCACTAACATTCCT…
PNGT#1	GBM-PN ( Verhaak et al. 2010 )	strong	strong	52.349	46	60	149	7.09333	1064	AGPAT4; ALCAM; AMOTL2; BEX4; BRD3; C1QL1; CAMTA1; CHD7; CLASP2; DNAJB5; DPF1; EYA1; GSTA4; HDAC2; HN1; ICK; KCND2; KIF1A; KLF12; MAGEH1; MLLT11; MNX1; NCAM1; NFIB; NOL4; NR0B1; OLIG2; PATZ1; PELI1; PSIP1; RBPJ; RNF144A; SATB1; SNAP91; SOX11; SOX4; STMN1; TCEAL2; TCF4; TSPYL4; VAX2; WASF1; ZBTB5; ZNF184; ZNF643; ZNF711;	BPTF; CDC5L; CTCF; E2F2; E2F3; ETV1; FOXM1; FUBP1; GBX2; GTF2I; HIC2; HLTF; HMBOX1; HOXD1; HOXD3; HSF2; INSM1; KLF12; MAZ; MECP2; MNX1; MYB; MYBL1; MYBL2; NFIB; NOTCH1; NR0B1; NR2C2; OLIG2; ONECUT2; PARP1; PBX1; POU2F1; PSIP1; RBPJ; SATB1; SMARCC1; SOX10; SOX11; SOX12; SOX2; SOX4; SOX5; SP4; TBX5; TCF12; TCF4; TCF7L1; TFAP2A; TFAP4; THRA; VAX2; YBX1; ZBTB33; ZEB1; ZNF238; ZNF281; ZNF589; ZNF652; …	MA0032.1.FOXC1; MA0069.1.Pax6; MA0073.1.RREB1; MA0077.1.SOX9; MA0090.1.TEAD1; MA0143.1.Sox2; MA0161.1.NFIC; BU0033.Irf3_primary; BU0069.Sox21_primary; BU0082.Tcf3_primary; BU0089.Tcfe2a_primary; ETS0010.h-ERF; ETS0017.h-ETV4; HOMEO0104_Meis1_2335.1; HOMEO0134_Pax6_3838.3; HOMEO0149_Pou3f2_2824.1; HOMEO0172_Tgif2_3451.1; TA0007_GLI2_monomer; TA0028_GLI2; HC_ARNT2_si; HC_BMAL1_f1; HC_ERR3_f1; HC_ET…	TTAATTAAAGAGCTCCTGGCCAAGGTCTTTGTGTTCAGACCAGAAGAGGAAGGAGGGCTCCCTCCCCCTGGGGCTGTGGAGGCTGAGGCTCCTGGGGGGTTGTCCACATCTGGACCGTGGGAGCTGTTGGGGGGAATGGGGGCAGGTGGAGAAGAGGATAAGCAGCTGATTGGGCCCAGACTACTCTGGGCTGGCTCCATCTTACATGACTGCCACAAACAGCTGCAGGAGTGTGACAGATCACAACACTAGCATTGTACCTCAAAATATGCTTGTACCCTAAGGCACAAGAACTGGTTTGACTTACAACCGCAGCCCCCGTCCGGGCACCCCGAGGCCCGCGGGAGCCACCCTCGAACCCCGGCCGCGCACGGGCGGGGCGGCGCGCACCTGCCGGGA…
PNGT#2	GBM-PN ( Verhaak et al. 2010 )	strong	strong	48.3222	46	60	149	7.76	1164	AGPAT4; ALCAM; AMOTL2; BEX4; BRD3; C1QL1; CAMTA1; CHD7; CLASP2; DNAJB5; DPF1; EYA1; GSTA4; HDAC2; HN1; ICK; KCND2; KIF1A; KLF12; MAGEH1; MLLT11; MNX1; NCAM1; NFIB; NOL4; NR0B1; OLIG2; PATZ1; PELI1; PSIP1; RBPJ; RNF144A; SATB1; SNAP91; SOX11; SOX4; STMN1; TCEAL2; TCF4; TSPYL4; VAX2; WASF1; ZBTB5; ZNF184; ZNF643; ZNF711;	BPTF; CDC5L; CTCF; E2F2; E2F3; ETV1; FOXM1; FUBP1; GBX2; GTF2I; HIC2; HLTF; HMBOX1; HOXD1; HOXD3; HSF2; INSM1; KLF12; MAZ; MECP2; MNX1; MYB; MYBL1; MYBL2; NFIB; NOTCH1; NR0B1; NR2C2; OLIG2; ONECUT2; PARP1; PBX1; POU2F1; PSIP1; RBPJ; SATB1; SMARCC1; SOX10; SOX11; SOX12; SOX2; SOX4; SOX5; SP4; TBX5; TCF12; TCF4; TCF7L1; TFAP2A; TFAP4; THRA; VAX2; YBX1; ZBTB33; ZEB1; ZNF238; ZNF281; ZNF589; ZNF652; …	MA0032.1.FOXC1; MA0069.1.Pax6; MA0073.1.RREB1; MA0077.1.SOX9; MA0090.1.TEAD1; MA0143.1.Sox2; MA0161.1.NFIC; BU0033.Irf3_primary; BU0069.Sox21_primary; BU0082.Tcf3_primary; BU0089.Tcfe2a_primary; ETS0010.h-ERF; ETS0017.h-ETV4; HOMEO0104_Meis1_2335.1; HOMEO0134_Pax6_3838.3; HOMEO0149_Pou3f2_2824.1; HOMEO0172_Tgif2_3451.1; TA0007_GLI2_monomer; TA0028_GLI2; HC_ARNT2_si; HC_BMAL1_f1; HC_ERR3_f1; HC_ET…	TTAATTAATCCCTCCTCTAATCCCTCCAGCGGGATCAGGGAGGAGGTGCGGGACCTGCTGCCCCGGGCTTGCCCCCATCCCGGCCTCACGCATGGGCGCCTGTCTCAGCCCTCTCCCAGGACGCTGCAGGTGTGGCTGGGCCAGCGCTAATTAGTGGGCCGCGCGGGGGCCCCGCTGAGCCTTTGACAGAAAAGGCGGTAGGGAGGTGGGGGCAGGGAGGCGCTCCACCAGCCAGAAGTCCGGAGCGCAACCCAAAGTACTCCATCTCAAAAGAAAAAAGGCGGGGGCGGTGGGGGGGGGGGGTGATTTCAGTACAAAGCCTACAGACATTATAAAAATATTAAGATTTTTGTTCGTTTGTTTTTTGTTTTTGAGACAGAGTCTCACTGTCACCCCCAG…
* CRE = Cis-regulatory elements
* MES = Mesenchymal
* CL = Classical
* PN = Proneural

## Sheet: GBM-sLCR genomic coord.
chr	start	end	gene_symbol	phenotype
chr2	204143079	204319716	ABI2	CL		* CRE = Cis-regulatory elements
chr2	223661189	223825739	ACSL3	CL		* MES = Mesenchymal
chr2	168644185	168822849	B3GALT1	CL		* CL = Classical
chr19	13831210	13943199	CC2D1A,CCDC130	CL		* PN = Proneural
chr3	49486344	49578567	DAG1	CL
chr7	140191234	140347990	DENND2A	CL
chr19	3484876	3547020	FZR1	CL
chr20	57397396	57526604	GNAS	CL
chr19	3556868	3586631	HMG20B	CL
chr13	110395442	110445118	IRS2	CL
chr19	18382838	18415161	JUND	CL
chr19	34731955	34851795	KIAA0355	CL
chr22	50467939	50542585	MLC1	CL
chr1	156629766	156659832	NES	CL
chr20	39723773	39802873	PLCG1	CL
chr19	604098	665844	POLRMT	CL
chr14	77711979	77793647	POMT2	CL
chr6	99215530	99297545	POU3F2	CL
chr7	136853382	137140592	PTN	CL
chr20	2832345	3037083	PTPRA	CL
chr19	10809947	10828761	QTRT1	CL
chr16	51113449	51236890	SALL1	CL
chr14	55022182	55282893	SAMD4A	CL
chr7	29960389	30060600	SCRN1	CL
chr15	47311230	48213517	SEMA6D	CL
chr19	16882239	17001492	SIN3B	CL
chr8	42268828	42531687	SLC20A2	CL
chr9	84137820	84307005	TLE1	CL
chr19	19220748	19251003	TMEM161A	CL
chr19	18907766	18978461	UPF1	CL
chr20	2797361	2846909	VPS16	CL
chr19	57614878	57752319	ZNF264	CL
chr6	161558353	161736333	AGPAT4	PN
chr3	105070453	105408351	ALCAM	PN
chr3	134058439	134148043	AMOTL2	PN
chrX	102465982	102504364	BEX4	PN
chr9	136890726	136965377	BRD3	PN
chr17	43030360	43055048	C1QL1	PN
chr1	6777839	7849437	CAMTA1	PN
chr8	61563448	61790920	CHD7	PN
chr3	33480847	33775570	CLASP2	PN
chr9	34985198	35019129	DNAJB5	PN
chr19	38664915	38724984	DPF1	PN
chr8	71853308	72526287	EYA1	PN
chr6	52840199	52862100	GSTA4	PN
chr6	114257121	114302590	HDAC2	PN
chr17	73127186	73168311	HN1	PN
chr6	52859691	52936212	ICK	PN
chr7	119728240	120440827	KCND2	PN
chr2	241641750	241780619	KIF1A	PN
chr13	73987281	74866500	KLF12	PN
chrX	55476002	55516928	MAGEH1	PN
chr1	151030226	151043592	MLLT11	PN
chr7	156779636	156849729	MNX1	PN
chr11	112705426	113162757	NCAM1	PN
chr9	14029311	14436549	NFIB	PN
chr18	31339610	31906981	NOL4	PN
chrX	30293879	30364514	NR0B1	PN
chr21	34366394	34501346	OLIG2	PN
chr22	31708126	31744872	PATZ1	PN
chr2	64282122	64447282	PELI1	PN
chr9	15416500	15534441	PSIP1	PN
chr4	26237055	26462796	RBPJ	PN
chr2	7036409	7185860	RNF144A	PN
chr3	18336727	18606437	SATB1	PN
chr6	84123425	84571339	SNAP91	PN
chr2	5765810	5877628	SOX11	PN
chr6	21522952	21601510	SOX4	PN
chr1	26201200	26284757	STMN1	PN
chrX	101340668	101385078	TCEAL2	PN
chr18	52760547	53452112	TCF4	PN
chr6	116539121	116590173	TSPYL4	PN
chr2	71088603	71175591	VAX2	PN
chr6	110373327	110572911	WASF1	PN
chr9	37430198	37483386	ZBTB5	PN
chr6	27373669	27464423	ZNF184	PN
chr1	40904039	40942731	ZNF643	PN
chrX	84369423	84546745	ZNF711	PN
chr2	143340258	143794239	KYNU	MES
chr9	16307172	17071294	BNC2	MES
chr5	169024242	169533445	DOCK2	MES
chr6	6105509	6412727	F13A1	MES
chr10	33400973	33712635	NRP1	MES
chr5	77761989	77980966	LHFPL2	MES
chr1	198548747	198760660	PTPRC	MES
chr6	106891589	107021230	AIM1	MES
chr17	32526748	32647659	CCL2	MES
chr10	45845915	45962655	ALOX5	MES
chr6	106474543	106590594	PRDM1	MES
chr5	35814929	35928408	IL7R	MES
chr11	10433572	10532405	AMPD3	MES
chr6	36061595	36147732	MAPK13	MES
chr7	115819649	115903433	TES	MES
chrX	37603128	37686500	CYBB	MES
chr8	37708051	37785111	RAB11FIP1	MES
chr10	5982008	6057920	IL15RA	MES
chr13	46685966	46761545	LCP1	MES
chr11	130013469	130084095	ST14	MES
chr1	183519361	183580489	NCF2	MES
chr10	75644978	75702860	PLAU	MES
chr7	100737678	100788850	SERPINE1	MES
chr4	38791857	38835516	TLR1	MES
chr12	8197949	8232317	C3AR1	MES
chrX	153264077	153295694	IRAK1	MES
chr1	202111201	202137248	PTPN7	MES
